# Supplementary material for: High-throughput framework for genetic analyses of adverse drug reactions using electronic health records
Source: PLOS journal article supplement (doi:10.1371/journal.pgen.1009593), 2021-06-01
Supplement: S3 (10.1371/journal.pgen.1009593.s003) [file journal.pgen.1009593.s003]

**S3 Table.** Trans-ethnic replication of lead variant per signal associated with adverse drug reactions in individuals with self-reported African ancestry.

| Adverse Drug Reactions     | Variant     | Mapped Gene         | Consequence | Allele <sup>a</sup> | EAF <sup>b</sup> | R <sup>2</sup> | OR (95% CI) <sup>c</sup> | P    |
|----------------------------|-------------|---------------------|-------------|---------------------|------------------|----------------|--------------------------|------|
| Aspirin                    | rs115346678 | SSBP2, ATG10        | intergenic  | G/A                 | 0.03             | 0.98           | 0.97 (0.52 to 1.41)      | 0.88 |
| Cephalexin                 | rs34545984  | LOC105376453, OTUD1 | intergenic  | G/T                 | < 0.005          |                |                          |      |
| Codeine                    | rs9620007   | WBP2NL              | intronic    | C/G                 | 0.32             | 0.98           | 0.93 (0.81 to 1.06)      | 0.28 |
| CYP2D6-metabolized opioids | rs62436463  | OPRM1               | intronic    | C/T                 | 0.02             | 0.94           | 0.77 (0.46 to 1.09)      | 0.11 |
|                            | rs739296    | SEPTIN3             | intronic    | G/A                 | 0.30             | 0.99           | 0.97 (0.87 to 1.06)      | 0.45 |
|                            | rs11049274  | PTHLH, LOC729291    | intergenic  | G/A                 | 0.02             | 1.00           | 1.38 (0.53 to 2.23)      | 0.46 |
|                            | rs113100019 | FIP1L1              | intronic    | T/G                 | < 0.005          |                |                          |      |
| Meperidine                 | rs185462714 | SERINC5             | intronic    | A/G                 | < 0.005          |                |                          |      |
|                            | rs115200108 | HLA-B, MICA-AS1     | intergenic  | C/A                 | 0.01             | 1.00           | 0.77 (0.29 to 1.25)      | 0.28 |
| Simvastatin                | rs76103438  | DIPK2A, LNCSRLR     | intergenic  | T/A                 | 0.01             | 0.90           | 1.89 (0.53 to 3.26)      | 0.36 |

EAF = Minor allele frequency; R<sup>2</sup> = imputation quality

<sup>a</sup> Alleles are listed as reference/effect and are reported in the forward strand.

<sup>b</sup> Variants with MAF < 0.005 were excluded from analysis.

<sup>c</sup> OR and 95% CIs were derived from logistic regression models adjusted for sex, age, length of electronic health records (years), and first 10 principal components.
